# Supplementary material for: The Health Economic Evaluation of Bariatric Surgery Versus a Community Weight Management Intervention Analysis from the Idiopathic Intracranial Hypertension Weight Trial (IIH:WT)
Source: MDPI journal article supplement (doi:10.3390/life11050409), 2021-04-30
Supplement: s1 [file s1]

**Supplementary Materials:**

# **The Health Economic Evaluation of Bariatric Surgery Versus a Community Weight Management Intervention Analysis from the Idiopathic Intracranial Hypertension Weight Trial (IIH:WT)**

**Supplementary Table S1.** Unit costs (GBP, 2017–18 prices)

| Resource Use Item                                               | Unit Cost, GBP                | Source                                     |
|-----------------------------------------------------------------|-------------------------------|--------------------------------------------|
| <i>Interventions</i>                                            |                               |                                            |
| <i>Surgery</i>                                                  |                               |                                            |
| Gastric band                                                    | 5078                          | 2017/18 Reference Costs                    |
| Sleeve                                                          | 1058                          |                                            |
| Bypass                                                          | 5809                          |                                            |
| Diet programme (3 months)                                       | 48.5                          | 2017/18 Reference Costs                    |
| <i>Primary care</i>                                             |                               |                                            |
| GP (per consultation)                                           | 38                            | Unit costs of health and social care, 2018 |
| Practice Nurse (per consultation)                               | 10.9                          | Unit costs of health and social care, 2018 |
| <i>Secondary care-outpatient</i>                                |                               |                                            |
| A&E                                                             | 148.00                        | 2017/18 Reference Costs                    |
| IIH consultation (multi-professional, face-to-face)             | 225.00                        | 2017/18 Reference Costs                    |
| Ophthalmology                                                   | 139.00                        | 2017/18 Reference Costs                    |
| Neurology                                                       | 178.9                         | 2017/18 Reference Costs                    |
| Dietitian                                                       | 32.3                          | 2017/18 Reference Costs                    |
| Adjustment gastric band (post-surgery)                          | 937                           | 2017/18 Reference Costs                    |
| Lumbar puncture                                                 |                               | 2017/18 Reference Costs                    |
| <i>Secondary care-inpatient</i>                                 |                               |                                            |
| Non-elective spell tariff (trim point = 11)                     | 1323                          | 2017/18 Reference Costs                    |
| Tariff adjustment (for extra day in hospital beyond trim point) | 240                           | 2017/18 Reference Costs                    |
| <b>Drug name, dose (size of package).</b>                       | <b>Cost per package (GBP)</b> |                                            |
| Acetazolamide, 250 mg (110)                                     | 16.9                          | BNF 2018                                   |
| Acetazolamide Modified release, 250 mg (30)                     | 16.7                          | BNF 2018                                   |
| Topiramate 25 mg (60)                                           | 1                             | BNF 2018                                   |
| Topiramate 50 mg (60)                                           | 1.4                           | BNF 2018                                   |
| Topiramate 100 mg (60)                                          | 2.3                           | BNF 2018                                   |
| Amiloride 5 mg (28)                                             | 3.2                           | BNF 2018                                   |
| Bendroflumethiazide 2.5 mg (28)                                 | 0.3                           | BNF 2018                                   |
| Bendroflumethiazide 5 mg (28)                                   | 0.3                           | BNF 2018                                   |
| Furosemide 20 mg (28)                                           | 0.4                           | BNF 2018                                   |
| Spironolactone 25 mg (28)                                       | 1                             | BNF 2018                                   |

|                                       |      |          |
|---------------------------------------|------|----------|
| Co-amilofruse 2.5 mg/20 mg (28)       | 5.6  | BNF 2018 |
| Co-amilofruse 5 mg/40 mg (28)         | 7.1  | BNF 2018 |
| Co-amilofruse 10 mg/80 mg (28)        | 15.5 | BNF 2018 |
| Atenolol 25 mg (28)                   | 0.4  | BNF 2018 |
| Atenolol 50 mg (28)                   | 0.4  | BNF 2018 |
| Atenolol 100 mg (28)                  | 0.5  | BNF 2018 |
| Candesartan 2 mg (28)                 | 9.9  | BNF 2018 |
| Labetalol hydrochloride 5 mg/mL (x 5) | 59.2 | BNF 2018 |
| Amlodipine 5 mg (28)                  | 1.4  | BNF 2018 |
| Ramipril 2.5 mg (28)                  | 0.6  | BNF 2018 |
| Amitriptyline 10 mg (28)              | 1    | BNF 2018 |
| Gabapentin 600 mg (100)               | 6.5  | BNF 2018 |
| Gabapentin 800 mg (100)               | 27.4 | BNF 2018 |
| Dosulepin 75 mg (28)                  | 1.2  | BNF 2018 |
| Dosulepin 25 mg (28)                  | 0.9  | BNF 2018 |
| Propranolol 10 mg (28)                | 0.9  | BNF 2018 |
| Nortriptyline 25 mg (100)             | 11.6 | BNF 2018 |
| Zonisamide 50 mg (56)                 | 34.3 | BNF 2018 |
| Mirtazapine 30 mg (28)                | 1    | BNF 2018 |

**Supplementary Table S2.** Data completeness.

|                             | Community weight Management Intervention |                      |       | Bariatric Surgery Pathway |                      |       |
|-----------------------------|------------------------------------------|----------------------|-------|---------------------------|----------------------|-------|
|                             | Complete                                 | Incomplete (imputed) | Total | Complete                  | Incomplete (imputed) | Total |
| <b>12 months</b>            |                                          |                      |       |                           |                      |       |
| Intracranial pressure       | 25                                       | 8                    | 33    | 29                        | 4                    | 33    |
| GP Visits                   | 27                                       | 6                    | 33    | 29                        | 4                    | 33    |
| Nurse Visits                | 24                                       | 9                    | 33    | 27                        | 6                    | 33    |
| Number of outpatient visits | 33                                       | 0                    | 33    | 33                        | 0                    | 33    |
| Number of days in hospital  | 33                                       | 0                    | 33    | 33                        | 0                    | 33    |
| <b>24 months</b>            |                                          |                      |       |                           |                      |       |
| Intracranial pressure       | 18                                       | 15                   | 33    | 22                        | 11                   | 33    |
| GP Visits                   | 23                                       | 10                   | 33    | 23                        | 10                   | 33    |
| Nurse Visits                | 19                                       | 14                   | 33    | 23                        | 10                   | 33    |
| Number of outpatient visits | 32                                       | 1                    | 33    | 33                        | 0                    | 33    |
| Number of days in hospital  | 31                                       | 2                    | 33    | 33                        | 0                    | 33    |
